# Supplementary material
Source: publisher site journal article supplement (https://www.dovepress.com/article/265346)
Supplement: Supplementary file 1 [file get_supplementary_file.php]

## **Supplementary data**

### **1. What is your gender?**

- Male
- Female

### **2. What is your date birth?**

\_\_\_\_\_year \_\_\_month

### **3. What is your educational background?**

- Illiteracy
- Primary school
- Junior high school
- High school or technical secondary school
- Junior college
- Undergraduate
- Master degree and above

### **4. Which of the following diseases do you currently suffer from?**

- Ulcerative colitis
- Crohn's Disease
- Unclassified

### **5. What is your household registration?**

- rural household registration
- urban household registration

### **6.1 How long has it been since your bowel disease came on??**

- less than 1 year
- 1 to 2 years
- 2 to 5 years
- 5 to 10 years
- 10 to 15 years
- 15 to 19 years
- More than 20 years

### **6.2 How long has it been since your bowel disease was diagnosed??**

- less than 1 year
- 1 to 2 years
- 2 to 5 years
- 5 to 10 years
- 10 to 15 years
- 15 to 19 years
- More than 20 years

**7. Have you ever participated in activities organized by patients with IBD (inflammatory bowel disease, including ulcerative colitis and Crohn's disease) (such as patient associations or patient clubs, patient associations, etc.)**

- Yes
- No

**(If question 7 is Yes, please answer question 8. If question 7 is No, please skip to question 9)**

**8. What is the specific patient organization you participate in? [Multiple Choice Question]**

- China Crohn's & Colitis Foundation, CCCF
- Patient groups organized by hospitals or doctors
- Patient groups spontaneously organized by patients
- Patient group organized by pharmaceutical company
- Others

**9. Have you used the following treatment methods, such as:**

- (1) Oral or injectable corticosteroids
  - (2) Immunomodulators
  - (3) Biological therapies
- Yes
  - No
  - Not remember
  - Not clear

**(If question 9 is Yes, please answer question 10. Otherwise, please skip to question 15)**

**10. Which of the following immunosuppressive drugs have you used? (You can ask your doctor to help determine this) [Multiple Choice Questions]**

- Oral or injectable corticosteroids
- Immunomodulators
- Biological therapies
- Not remember
- Not clear

**(If question 10 is one of the first three choices, please answer question 11,12. Otherwise, please skip to question 13)**

**11. Which of the following immunosuppressive drugs did you use for the first time? (You can ask your doctor to help determine this) [Multiple Choice Question]**

- Oral or injectable corticosteroids
- Immunomodulators
- Biological therapies
- Not remember
- Not clear

**12. How long have you been taking this treatment (s)?**

- less than 1 year
- 1 to 2 years
- 2 to 5 years
- 5 to 10 years
- 10 to 15 years
- 15 to 19 years
- More than 20 years

**13. When you first used the above immunosuppressive drugs, did your doctor notify you about vaccination?**

- Yes
- No
- Not clear
- Not remember

**14. Who was the first doctor to provide you with the above immunosuppressive drugs?**

- Community Doctor/General Practitioner
- general gastroenterologist
- IBD specialist
- Abdominal surgeon
- Anorectal surgeon
- Other
- Unclear

**15. During your illness, did your doctor notify you about vaccination ?**

- Yes
- No
- Not clear
- Not remember

**16. Did you still preserve your vaccination record?**

- Yes

- No
- Never have vaccination record
- Not clear

**17. Based on your current illness or current treatment plan, do you think you need to be vaccinated?**

- Yes
- No
- I do not know

**18. Do you fully understand the vaccination related to your disease (Crohn's disease or ulcerative colitis)?**

- No
- Rather
- Rather yes
- Yes

**(If you choose No for question 18, please skip directly to question 20. Otherwise, please answer question 19)**

**19. What is your source of information about vaccination related to your disease (referring to Crohn's disease or ulcerative colitis)?**

- IBD specialist
- general gastroenterologist
- nurse
- patient association
- patients
- public health agencies
- other media

**20. If the following sources of information provide you with information about vaccination for your disease (referring to Crohn's disease or ulcerative colitis), how reliable do you think each item is?**

|                            | trustable             | rather trustable      | Not sure              | rather not trustable  | not trustable         |
|----------------------------|-----------------------|-----------------------|-----------------------|-----------------------|-----------------------|
| IBD specialist             | <input type="radio"/> |
| general gastroenterologist | <input type="radio"/> |
| nurse                      | <input type="radio"/> |

|                        |                       |                       |                       |                       |                       |
|------------------------|-----------------------|-----------------------|-----------------------|-----------------------|-----------------------|
| patient association    | <input type="radio"/> |
| patients               | <input type="radio"/> |
| public health agencies | <input type="radio"/> |
| other media            | <input type="radio"/> |

**21. What do you think of the overall safety of domestic vaccines?**

- Basically safe
- Mostly safe
- Only part of vaccines are safe
- All vaccines are unsafe
- Not sure

**22. Due to your disease or treatment plan, do you think you are more likely to suffer from infections (such as colds, herpes, pneumonia, etc.) than normal people?**

- Yes, it is very easy to get infected
- Yes, it is easier
- Almost normal
- Not know

**23. Where do you usually get the vaccine?**

- Community Medical Service Center
- CDC (Disease Control Center)
- Unclear
- Never vaccinated

**24. Based on your current disease and treatment plan, do you know the recommended vaccination?**

- Yes
- No

**25. Based on your current disease and treatment plan, do you know the contraindicated vaccination?**

- Yes
- No

**26. Do you think the hepatitis B vaccine is effective in preventing hepatitis B?**

- Yes
- Rather yes
- Rather
- No
- Not clear

**27. Do you think hepatitis B vaccine is safe?**

- Yes
- Rather yes
- Rather
- No
- Not clear

**28. Have you received hepatitis B vaccine after the onset of IBD (inflammatory bowel disease, including ulcerative colitis and Crohn's disease)?**

- Yes
- No
- Not clear

**(If you choose Yes for question 28, please answer question 29, if you choose No for question 28, please answer 30. Otherwise, please skip directly to question 31)**

**29. Why did you choose to get the hepatitis B vaccine? [Multiple Choice Question]**

- I felt that I am at a risk of getting hepatitis B
- Vaccination has been recommended by doctors or nurses
- I learned from sources (other than medical care) that I need hepatitis B vaccine
- Others

**30. Why don't you choose to get hepatitis B vaccine? [Multiple Choice Question]**

- I cannot be vaccinated (because I carry the hepatitis B virus)
- I didn't need to be vaccinated (the doctor said that I already have hepatitis B resistance and do not need to be vaccinated)
- No one has recommended me to vaccinate
- I didn't think that I am at a risk of getting hepatitis B
- I am afraid of the adverse effects of the vaccine
- I think the vaccine will not prevent hepatitis B infection
- I am against all vaccinations
- I forgot to vaccinate
- Others

**31. Do you think the varicella vaccine is effective in preventing varicella?**

- Yes
- Rather yes
- Rather
- No
- Not clear

**32. Do you think the varicella vaccine is safe?**

- Yes
- Rather yes
- Rather
- No
- Not clear

**33. Have you received the varicella vaccine after the onset of IBD (inflammatory bowel disease, including ulcerative colitis and Crohn's disease)?**

- Yes
- No

Not clear

**(If you choose Yes for question 33, please answer question 34, if you choose No for question 33, please answer 35. Otherwise, please skip directly to question 36)**

**34. Why did you choose to get the varicella vaccine? [Multiple Choice Question]**

- I felt that I am at a risk of getting varicella
- Vaccination has been recommended by doctors or nurses
- I learned from sources (other than medical care) that I need varicella vaccine
- Others

**35. Why didn't you choose to get the varicella vaccine? [Multiple Choice Question]**

- No one has recommended me to vaccinate
- I didn't need to be vaccinated (the doctor said that I already have varicella resistance and do not need to be vaccinated)
- I didn't think I'm at risk of getting varicella
- I am afraid of the adverse effects of the vaccine
- I think the vaccine will not prevent varicella infection
- I am against all vaccinations
- I forgot to vaccinate
- Others

**36. Do you want more professional and specific information about vaccine?**

- Yes
- No

**37. What do you want to know about vaccine? [Multiple Choice Question]**

- Vaccine recommendations related to your current condition
- Contraindications for vaccination related to your current condition
- Side effects and safety of the vaccine
- Other \_\_\_\_\_



Patient's trust on the following sources

| source                        | trustable      | Rather<br>trustable | Not sure  | Rather not<br>trustable | Not<br>trustabl<br>e |
|-------------------------------|----------------|---------------------|-----------|-------------------------|----------------------|
|                               | IBD specialist | 633(70.3)           | 229(25.4) | 34(3.8)                 | 2(0.2)               |
| general<br>gastroenterologist | 201(22.3)      | 464(51.6)           | 206(22.9) | 24(2.7)                 | 5(0.6)               |
| nurse                         | 141(15.7)      | 379(42.1)           | 313(34.8) | 51(5.7)                 | 16(1.8)              |
| patient association           | 179(19.9)      | 421(46.8)           | 264(29.3) | 30(3.3)                 | 6(0.7)               |
| patients                      | 89(9.9)        | 252(28.0)           | 491(54.6) | 55(6.1)                 | 13(1.4)              |
| public health<br>agencies     | 162(18.0)      | 383(42.6)           | 310(34.4) | 36(4.0)                 | 9(1.0)               |
| other media                   | 60(6.7)        | 120(13.3)           | 518(57.6) | 154(17.1)               | 48(5.3)              |

Relationship between immunosuppressive treatment and vaccination notification

|                                | Vaccination notification |     | $\chi^2$ value | P value |
|--------------------------------|--------------------------|-----|----------------|---------|
|                                | Yes                      | No  |                |         |
| Immunosuppressive<br>treatment |                          |     |                |         |
| Yes                            | 295                      | 238 | 62.210         | <0.001  |
| No                             | 13                       | 89  |                |         |
